# Supplementary material for: Anti-Obesity Effects of Multi-Strain Probiotics in Mice with High-Carbohydrate Diet-Induced Obesity and the Underlying Molecular Mechanisms
Source: MDPI journal article supplement (doi:10.3390/nu14235173), 2022-12-05
Supplement: s1 [file s1]

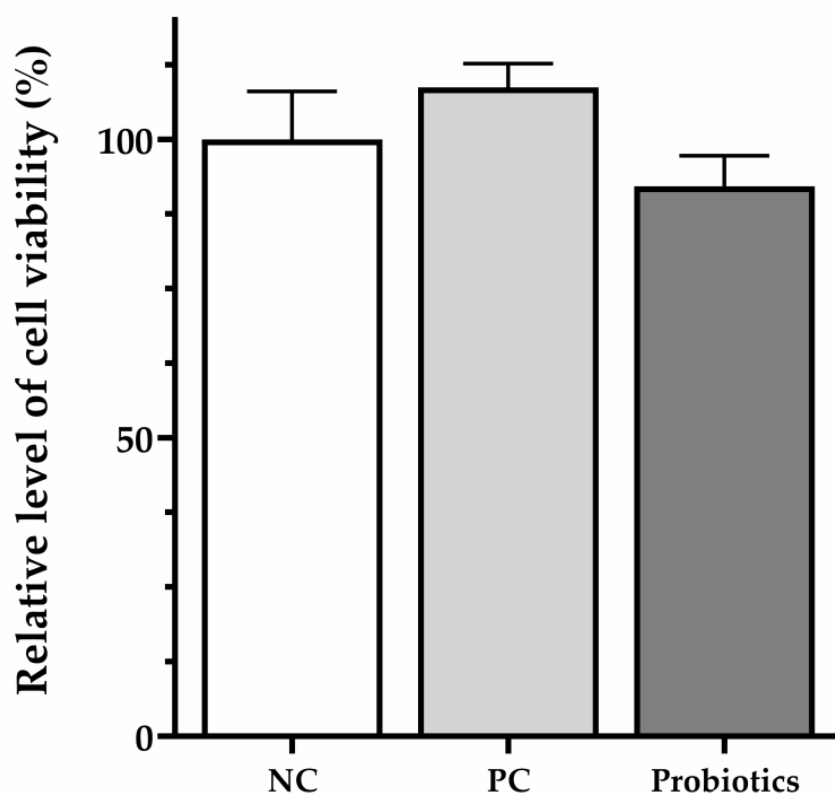

**Supplementary Figure S1. Cell viability (MTT assay).** Legend: NC, negative control; PC, orlistat-treated cells.

**Supplementary Table S1. Serum concentrations of hormones associated with the development of obesity**

|                  | Leptin (μg/ml)   | Adiponectin (μg/ml) | Insulin (μg/ml) |
|------------------|------------------|---------------------|-----------------|
| ND               | 6.92 ± 0.94      | 12.45 ± 1.21        | 0.93 ± 0.07     |
| HCD + Placebo    | 65.13 ± 5.07 *** | 6.34 ± 0.82 ***     | 1.77 ± 0.10 *** |
| HCD + Probiotics | 45.01 ± 3.02###  | 8.10 ± 0.86###      | 1.34 ± 0.08###  |

Data are expressed as mean ± standard deviation (n=5 per group). \*\*\* p<0.001 vs ND; ### p<0.001 vs HCD + placebo. Legend: HCD, high carbohydrate diet; ND, normal diet.
